# Supplementary material for: Fatty Acid Content in Biomasses: State-of-the-Art and Novel Physical Property Estimation Methods
Source: Hindawi journal article supplement (doi:10.1155/2019/2430234), 2019-11-23
Supplement: f1 [file 2430234.f1.pdf]

# Supplementary Material

## A.1. Joback and Reid, 1987

Table A 1 – Joback and Reid group contributions for the estimation of the components properties [148].

| Group              | $T_{bi}$ | $T_{Ci}$ | $P_{Ci}$ | $V_{Ci}$ | $T_{mi}$ | $\Delta H_{vap_i}$ | $\Delta H_{fus_i}$ |
|--------------------|----------|----------|----------|----------|----------|--------------------|--------------------|
| –CH <sub>3</sub>   | 23.58    | 0.0141   | -0.0012  | 65       | -5.1     | 2.373              | 0.908              |
| –CH <sub>2</sub> – | 22.88    | 0.0189   | 0        | 56       | 11.27    | 2.226              | 2.590              |
| = CH –             | 26.73    | 0.0129   | -0.0006  | 46       | 8.73     | 1.691              | 0.749              |
| –COOH              | 169.09   | 0.0791   | 0.0077   | 89       | 155.5    | 0.636              | -1.460             |

Table A 1 (continued) – Joback and Reid group contributions for the estimation of the components properties [148].

| Group              | $C_{p,a_i}$ | $C_{p,b_i}$ | $C_{p,c_i}$ | $C_{p,d_i}$ | $v_{A_i}$ | $v_{B_i}$ |
|--------------------|-------------|-------------|-------------|-------------|-----------|-----------|
| –CH <sub>3</sub>   | 1.95E+01    | -8.08E-03   | 1.53E-04    | -9.67E-08   | 548.29    | -1.719    |
| –CH <sub>2</sub> – | -9.09E-01   | 9.50E-02    | -5.44E-05   | 1.19E-08    | 94.16     | -0.199    |
| = CH –             | -8.00       | 1.05E-01    | -9.63E-05   | 3.56E-08    | 82.28     | -0.242    |
| –COOH              | 2.41E+01    | 4.27E-02    | 8.04E-05    | -6.87E-08   | 1317.23   | -2.578    |

## A.2. Constantinou and Gani, 1994

Table A 2 – Constantinou and Gani group contributions for the estimation of the components properties – first order [149], [162]

| Group           | $t_{b1i}$ | $t_{c1k}$ | $P_{c1k}$ (bar <sup>-0.5</sup> ) | $v_{c1k}$ (m <sup>3</sup> /kmol) | $t_{m1i}$ | $h_{v1i}$ | $\omega_{1i}$ |
|-----------------|-----------|-----------|----------------------------------|----------------------------------|-----------|-----------|---------------|
| CH <sub>3</sub> | 0.8894    | 1.6781    | 0.019904                         | 0.07504                          | 0.4640    | 4.116     | 0.296         |
| CH <sub>2</sub> | 0.9225    | 3.4920    | 0.010558                         | 0.05576                          | 0.9246    | 4.650     | 0.147         |
| CH = CH         | 1.8433    | 7.3691    | 0.017865                         | 0.09541                          | 0.3557    | 2.771     | 0.252         |
| COOH            | 5.8337    | 23.7593   | 0.011507                         | 0.10188                          | 11.5630   | 1.284     | 1.670         |

Table A 3 – Constantinou and Gani group contributions for the estimation of the components properties – second order [149], [162]

| Group                                                               | $t_{b2j}$ | $t_{c2j}$ | $P_{c2j}$ (bar <sup>-0.5</sup> ) | $v_{c2k}$ (m <sup>3</sup> /kmol) | $t_{m2j}$ | $h_{v2j}$ | $\omega_{2j}$ |
|---------------------------------------------------------------------|-----------|-----------|----------------------------------|----------------------------------|-----------|-----------|---------------|
| CH <sub>2</sub> – CH <sub>m</sub> = CH <sub>n</sub><br>m, n ∈ (0,2) | - 0.1406  | - 0.5231  | 0.003538                         | 0.00281                          | -0.5870   | -0.369    | -0.012        |

### A.3. Marrero-Marejón and Pardillo-Fontdevila, 1999

Table A 4 – Marrero-Marejón and Pardillo-Fontdevila method group-interaction contributions to determine pure compounds properties [150]

| Interactions with                          | $t_{bbk}$ | $t_{cbk}$ | $p_{cbk}$ | $v_{cbk}$ |
|--------------------------------------------|-----------|-----------|-----------|-----------|
| CH <sub>3</sub> – and – CH <sub>2</sub> –  | 194.25    | -0.0227   | -0.0430   | 88.6      |
| –CH <sub>2</sub> – and – CH <sub>2</sub> – | 244.88    | -0.0206   | -0.0272   | 56.6      |
| –CH <sub>2</sub> – and = CH –              | 201.80    | 0.8636    | 0.0818    | 50.7      |
| –CH <sub>2</sub> – and – COOH              | 1180.39   | -0.0932   | -0.0253   | 114.0     |
| = CH – and = CH –                          | 334.64    | -1.7660   | -0.2291   | 47.8      |

### A.4. Marrero and Gani, 2001

Table A 5 – Marrero and Gani group contributions for the estimation of the components properties – first order [151]

| Group           | $t_{b1i}$ | $t_{c1k}$ | $P_{c1k}$ | $V_{c1i}$ | $t_{m1i}$ | $H_{v1i}$ | $H_{fus1i}$ |
|-----------------|-----------|-----------|-----------|-----------|-----------|-----------|-------------|
| CH <sub>3</sub> | 0.8491    | 1.7506    | 0.018615  | 68.35     | 0.6953    | 0.217     | 1.660       |
| CH <sub>2</sub> | 0.7141    | 1.3327    | 0.013547  | 56.28     | 0.2515    | 4.910     | 2.639       |
| CH = CH         | 1.5597    | 3.0741    | 0.023003  | 98.43     | -0.3730   | 9.456     | 4.441       |
| COOH            | 5.1108    | 14.6038   | 0.009885  | 90.66     | 0.0256    | 17.002    | 10.692      |

Table A 6 – Marrero and Gani group contributions for the estimation of the components properties – second order [151]

| Group                                                               | $t_{b2j}$ | $t_{c2j}$ | $P_{c2j}$ | $V_{c2j}$ | $t_{m2j}$ | $H_{v2j}$ | $H_{fus2j}$ |
|---------------------------------------------------------------------|-----------|-----------|-----------|-----------|-----------|-----------|-------------|
| CH <sub>2</sub> – CH <sub>m</sub> = CH <sub>n</sub><br>m, n ∈ (0,2) | -0.0537   | 0.0262    | 0.000815  | 0.14      | -0.1077   | -0.060    | -0.632      |

### A.5. Nannoolal et al., 2004

Table A 7 – Nannoolal et al. group contributions for the estimation of the components properties [152], [156]

| Group              | $T_b$     | $T_c \times 10^3$ | $P_c \times 10^4$ | $V_c$   |
|--------------------|-----------|-------------------|-------------------|---------|
| –CH <sub>3</sub>   | 177.3066  | 41.8682           | 8.1620            | 28.7855 |
| –CH <sub>2</sub> – | 239.4531  | 40.0977           | 5.2623            | 32.0493 |
| –COOH              | 1080.3139 | 199.9042          | 3.9873            | 40.3909 |
| > C = C <          | 412.6276  | 45.4406           | 9.6413            | 48.1957 |

### A.6. Wilson and Jaspersion, 1996

Table A 8 – Wilson and Jaspersion for the estimation of the component's properties [155]

| Group       | $t_{cJ}$ | $p_{cJ}$ |
|-------------|----------|----------|
| <i>H</i>    | 0.002793 | 0.126600 |
| <i>C</i>    | 0.008532 | 0.729830 |
| <i>O</i>    | 0.020341 | 0.433600 |
| <i>COOH</i> | 0.017    | 0.5      |

## A.7. WAGNER25. Liquid vapour pressure

Table A 9 – WAGNER25. TDE Wagner 25 liquid vapour pressure (N/m<sup>2</sup>)

| CN   | $C_1 (-)$ | $C_2 (-)$ | $C_3 (-)$ | $C_4 (-)$ | $C_5 (\ln(P_C))(-)$ | $C_6, T_c(K)$ | $T_{lower} (K)$ | $T_{upper} (K)$ |
|------|-----------|-----------|-----------|-----------|---------------------|---------------|-----------------|-----------------|
| CN:0 | C8:0      | -14.5947  | 16.4471   | -24.9002  | 13.0849             | 14.8654       | 693.71          | 693.71          |
|      | C10:0     | -9.55395  | 4.25681   | -13.2861  | 1.10672             | 14.54584      | 723.769         | 723.769         |
|      | C12:0     | -15.1121  | 16.9579   | -26.4645  | 9.59019             | 14.4736       | 743             | 743             |
|      | C14:0     | -15.4539  | 16.8372   | -25.7647  | 5.48625             | 14.30994      | 763             | 763             |
|      | C16:0     | -8.81196  | -2.08817  | -2.79714  | -20.984             | 14.21405      | 785             | 785             |
|      | C 18:0    | -10.5921  | 2.53244   | -9.70946  | -12.4752            | 14.10047      | 803             | 803             |
|      | C 20:0    | -13.2693  | 7.32725   | -14.9518  | -2.90727            | 13.99791      | 820             | 820             |
|      | C 22:0    | -13.9916  | 9.16511   | -18.5369  | 2.20194             | 13.91998      | 837             | 837             |
|      | C 24:0    | -10.4801  | 3.78806   | -7.79263  | -4.98268            | 13.65123      | 825             | 825             |
| CN:1 | C16:1     | -12.2223  | 5.37393   | -11.5532  | -5.34164            | 14.21261      | 789             | 789             |
|      | C18:1     | -12.2064  | 5.35822   | -11.517   | -5.34069            | 14.02856      | 796             | 796             |
|      | C20:1     | -         | -         | -         | -                   | -             | -               | -               |
|      | C22:1     | -12.1692  | 5.32145   | -11.4321  | -5.33829            | 13.79869      | 806             | 806             |
|      | C24:1     | -         | -         | -         | -                   | -             | -               | -               |
| CN:2 | C18:2     | -11.6351  | 4.80818   | -10.2366  | -5.27866            | 14.25142      | 787             | 787             |
| CN:3 | C18:3     | -11.7961  | 4.9602    | -10.5927  | -5.30154            | 14.13086      | 777             | 777             |
